# Supplementary material for: Negligence in the Atlantic forest, northern Brazil: a case study of an endangered orchid
Source: Springer Nature journal article supplement (doi:10.1007/s10531-016-1285-5), 2017-01-09
Supplement: MOESM3 [file 11988062]

Title: Negligence in the Atlantic Forest, Northern Brazil: a case study of an endangered orchid

Journal title: Biodiversity and Conservation

Authors: Cristiane Gouvêa Fajardo1, Fábio de Almeida Vieira1, Leonardo Pessoa Felix2, Wagner Franco Molina1

Affiliations: 1 Universidade Federal do Rio Grande do Norte, 2 Universidade Federal da Paraíba

Corresponding author: Fábio de Almeida Vieira vieirafa@ufrnet.br

**Online Resource 3.** Plotting of the mean LnP(D) values from the Bayesian approach (full line) and Evanno’s ΔK (broken line). Error bars are standard deviations of LnP(D) values.
